# Supplementary material for: The Roles of APC and Axin Derived from Experimental and Theoretical Analysis of the Wnt Pathway
Source: PLoS Biol. 2003 Oct 13;1(1):e10. doi: 10.1371/journal.pbio.0000010 (PMC212691; doi:10.1371/journal.pbio.0000010)
Supplement: Table S2 — The rate constants marked with “#” play a role only in stimulated states where W ≠ 0. Note that some of the numerical values are given in a higher precision compared to Table 1. (111 KB DOC). [file pbio.0000010.st002.doc]

**Table S2.** Complete List of Model Parameters of the Wnt-Signal Transduction Model

The rate constants marked with (#) play a role only in stimulated states where . Note that some of the numerical values are given in a higher precision compared to Table S1.

| Parameter | Value | |
| --- | --- | --- |
| *Conservation quantities* |  |  |
|  | 100 | nM |
|  | 100 | nM |
|  | 15 | nM |
|  | 50 | nM |
| *Dissociation constants* |  |  |
|  | 50 | nM |
|  | 120 | nM |
|  | 30 | nM |
|  | 1200 | nM |
| *Rate constants* |  |  |
| (#) |  |  |
| (#) |  |  |
| (#) |  |  |
|  |  |  |
|  |  |  |
|  |  |  |
|  |  |  |
|  |  |  |
|  |  |  |
|  |  |  |
|  |  |  |
|  |  |  |
| *Synthesis fluxes* |  |  |
|  |  |  |
|  |  |  |
